# Supplementary material for: Emergence of transmissible SARS-CoV-2 variants with decreased sensitivity to antivirals in immunocompromised patients with persistent infections
Source: PubMed Central journal article supplement — medRxiv. 2024 Jun 18:2024.06.14.24308523. Preprint. [Version 1] doi: 10.1101/2024.06.14.24308523 (PMC11213110; doi:10.1101/2024.06.14.24308523), 2024-06-18
Supplement: media-1.pdf [file media-1.pdf]

**Supplementary Table 1.** Antiviral treatment and viral dynamics in immunocompromised patient cohort.

| Patient ID | Antiviral drug | Treatment day post-diagnosis          | Days PCR <sup>+</sup> | Clade | Days pd | Ct    | Accession    |
|------------|----------------|---------------------------------------|-----------------------|-------|---------|-------|--------------|
| 1995       | RDV            | 1-10                                  | 28                    | 20C   | 0       | NA    | SAMN40750127 |
|            |                |                                       |                       |       | 1       | NA    | SAMN40750128 |
|            |                |                                       |                       |       | 6       | NA    | SAMN40750128 |
| 2646       | RDV            | 15-19                                 | 32 <sup>*</sup>       | 21K   | 0       | NA    | SAMN40750130 |
|            |                |                                       |                       |       | 26      | 25.6  | SAMN40750131 |
| 10939      | RDV            | 2-6, 14-18                            | 33 <sup>®</sup>       | 20C   | 13      | 16.5  | SAMN40750132 |
|            |                |                                       |                       |       | 21      | 25.15 | SAMN40750133 |
| 11595      | RDV            | 2-7                                   | 38                    | 20G   | 14      | 19.4  | SAMN40750134 |
|            |                |                                       |                       |       | 20      | 19.25 | SAMN40750135 |
|            |                |                                       |                       |       | 26      | 20.7  | SAMN40750136 |
|            |                |                                       |                       |       | 38      | 20.7  | SAMN40750137 |
| 12105      | RDV            | 16-20                                 | 58 <sup>®</sup>       | 20G   | 0       | 14.8  | SAMN40750138 |
|            |                |                                       |                       |       | 21      | 28.3  | SAMN40750139 |
| 14675      | Paxlovid       | 1-5                                   | 66                    | 22C   | 0       | 32.3  | SAMN40750140 |
|            | RDV            | 31-35                                 |                       |       | 19      | 23.2  | SAMN40750141 |
|            |                |                                       |                       |       | 24      | 22.5  | SAMN40750142 |
|            |                |                                       |                       |       | 29      | NA    | SAMN40750143 |
|            |                |                                       |                       |       | 51      | NA    | SAMN40750144 |
| 16624      | RDV            | 1-5                                   | 42                    | 21K   | 0       | NA    | SAMN40750145 |
|            |                |                                       |                       |       | 12      | NA    | SAMN40750146 |
|            |                |                                       |                       |       | 27      | 22.7  | SAMN40750147 |
|            |                |                                       |                       |       | 47      | 22.7  | SAMN40750147 |
| 16902      | RDV            | 26-37,<br>47-51                       | 50 <sup>®</sup>       | 21K   | 0       | NA    | SAMN40750148 |
|            |                |                                       |                       |       | 1       | NA    | SAMN40750149 |
|            |                |                                       |                       |       | 7       | NA    | SAMN40750150 |
|            |                |                                       |                       |       | 11      | NA    | SAMN40750151 |
|            |                |                                       |                       |       | 14      | NA    | SAMN40750152 |
|            |                |                                       |                       |       | 26      | NA    | SAMN40750153 |
|            |                |                                       |                       |       | 28      | 25.1  | SAMN40750154 |
|            |                |                                       |                       |       | 36      | NA    | SAMN40750155 |
|            |                |                                       |                       |       | 42      | NA    | SAMN40750156 |
|            |                |                                       |                       |       | 47      | 23    | SAMN40750157 |
| 16915      | RDV            | 0-2                                   | 63                    | 21K   | 0       | NA    | SAMN40750158 |
|            |                |                                       |                       |       | 14      | 20.83 | SAMN40750159 |
|            |                |                                       |                       |       | 21      | 22.38 | SAMN40750160 |
|            |                |                                       |                       |       | 35      | 19.8  | SAMN40750161 |
| 17062      | RDV            | 0-4                                   | 72                    | 21K   | 8       | NA    | SAMN40750162 |
|            |                |                                       |                       |       | 11      | 18.76 | SAMN40750163 |
|            |                |                                       |                       |       | 34      | 22.4  | SAMN40750170 |
| 17320      | RDV            | 31-33                                 | 34                    | 21K   | 30      | 22.4  | SAMN40750170 |
|            |                |                                       |                       |       | 31      | 21.4  | SAMN40750171 |
|            |                |                                       |                       |       | 34      | 25.5  | SAMN40750172 |
| 17386      | RDV            | 3-7,<br>38-42,<br>108-111,<br>148-152 | 157                   | 21K   | 104     | 24.8  | SAMN40750173 |
|            |                |                                       |                       |       | 141     | NA    | SAMN40750174 |
|            |                |                                       |                       |       | 143     | 20.8  | SAMN40750175 |
| 17423      | RDV            | 0-2                                   | 190                   | 21K   | 0       | NA    | SAMN40750176 |
|            |                |                                       |                       |       | 3       | 21.5  | SAMN40750177 |
|            |                |                                       |                       |       | 15      | 20.5  | SAMN40750178 |
|            |                |                                       |                       |       | 32      | 14.5  | SAMN40750179 |
|            |                |                                       |                       |       | 39      | 15.2  | SAMN40750180 |
|            |                |                                       |                       |       | 42      | 28.2  | SAMN40750181 |
|            |                |                                       |                       |       | 53      | 18    | SAMN40750182 |
|            |                |                                       |                       |       | 60      | 23.4  | SAMN40750183 |
|            |                |                                       |                       |       | 67      | 25.5  | SAMN40750184 |
|            |                |                                       |                       |       | 81      | 19.7  | SAMN40750185 |
|            |                |                                       |                       |       | 102     | 20    | SAMN40750186 |
|            |                |                                       |                       |       | 137     | 20    | SAMN40750187 |
|            |                |                                       |                       |       | 141     | 21.5  | SAMN40750188 |
|            |                |                                       |                       |       | 152     | NA    | SAMN40750189 |
| 18323      | RDV            | 74-78                                 | 131                   | 21L   | 0       | 26    | SAMN40750190 |
|            | Paxlovid       | 81-85                                 |                       |       | 6       | 17.1  | SAMN40750191 |
|            |                |                                       |                       |       | 29      | 16.3  | SAMN40750192 |
|            |                |                                       |                       |       | 73      | NA    | SAMN40750193 |
|            |                |                                       |                       |       | 77      | NA    | SAMN40750193 |
| 17072      | Paxlovid       | 0-4                                   | 81                    | 21K   | 22      | NA    | SAMN40750164 |
|            | RDV            | 20-24,<br>31-35,<br>63-67             |                       |       | 52      | 21.9  | SAMN40750165 |
|            |                |                                       |                       |       | 68      | 20.2  | SAMN40750166 |
|            |                |                                       |                       |       | 77      | NA    | SAMN40750167 |
|            |                |                                       |                       |       | 80      | 25.7  | SAMN40750168 |
|            |                |                                       |                       |       | 81      | NA    | SAMN40750169 |

Note: <sup>+</sup>indicates that the patient died in the following month after hospitalization without retesting for SARS-CoV-2.  
<sup>@</sup>indicates that the patient died while SARS-CoV-2 positive. RDV-remdesivir. pd-post COVID-19 diagnosis. Ct-cycle threshold. NA-not available. Sequencing data are available under the BioProject PRJNA1088540.

**Supplementary Table 2.** Non-synonymous SARS-CoV-2 substitutions identified in nsp5 and nsp12. Samples are compared to their SARS-CoV-2 clade reference. Mutations exceeding 98% frequency of the sequence reads in all samples sequenced per patient may signify strain-specific diversity that established the infection, rather than fixation over the course of the infection.

| Patient ID | Total Collections Sequenced | Clade | Variant      | Frequency Range | Number of Collections with Variant |
|------------|-----------------------------|-------|--------------|-----------------|------------------------------------|
| 1995       | 3                           | 20C   | nsp12: A16V  | 1               | 3                                  |
| 10939      | 2                           | 20C   | nsp5: P96S   | 1               | 2                                  |
| 11595      | 4                           | 20G   | nsp12: E136A | 0.27            | 1                                  |
|            |                             |       | nsp12: V166L | 0.11            | 1                                  |
|            |                             |       | nsp12: Q444K | 0.05 - 0.07     | 2                                  |
|            |                             |       | nsp12: V792I | 0.09 - 0.31     | 3                                  |
|            |                             |       | nsp12: M794I | 0.17 - 0.9      | 3                                  |
|            |                             |       | nsp12: C799F | 0.1             | 1                                  |
|            |                             |       | nsp12: V820G | 0.03            | 1                                  |
| 12105      | 2                           | 20G   | nsp12: V605I | 1               | 2                                  |
| 16902      | 10                          | 21K   | nsp12: C464Y | 1               | 2                                  |
|            |                             |       | nsp12: C799Y | 0.98            | 1                                  |
| 16915      | 4                           | 21K   | nsp12: T644M | 0.06 - 0.07     | 2                                  |
|            |                             |       | nsp5: M165I  | 0.09            | 1                                  |
| 17072      | 6                           | 21K   | nsp5: T169I  | 0.34 - 0.92     | 4                                  |
|            |                             |       | nsp5: A173T  | 0.1 - 0.74      | 2                                  |
|            |                             |       | nsp5: G283C  | 0.05            | 1                                  |
|            |                             |       | nsp12: T643I | 0.26            | 1                                  |
|            |                             |       | nsp12: V792I | 0.27 - 0.98     | 4                                  |
|            |                             |       | nsp12: E796K | 0.23 - 1        | 3                                  |
|            |                             |       | nsp12: I171M | 0.05            | 1                                  |
| 17320      | 3                           | 21K   | nsp5: L253I  | 0.03 - 0.04     | 2                                  |
| 17423      | 14                          | 21K   | nsp12: V820G | 0.03            | 1                                  |
|            |                             |       | nsp12: F859L | 0.03            | 1                                  |
| 18323      | 4                           | 21L   | nsp5: T21I   | 0.04            | 1                                  |

**Supplementary Table 3.** Relevant laboratory data of patient 11595 during the disease course.

| Laboratory Parameter                            | Days after COVID-19 Diagnosis |      |      |      |       |      |      |      |      |
|-------------------------------------------------|-------------------------------|------|------|------|-------|------|------|------|------|
|                                                 | Normal Range                  | 0    | 7    | 14   | 20    | 23   | 26   | 30   | 38   |
| CT value                                        |                               |      |      | 19.4 | 19.25 |      | 20.7 |      | 20.7 |
| WBC count, ( $\times 10^3/\mu\text{L}$ )        | 3.4-11.2                      | 3.79 | 2.33 | 2.8  | 1.47  | 1.45 | 1.62 | 3.98 | 4.02 |
| Neutrophil count, ( $\times 10^3/\mu\text{L}$ ) | 1.8-7.0                       | **   | **   | 2.38 | 1.22  | 0.85 | 1.38 | 3.0  | 3.59 |
| Neutrophils (%)                                 | 45-75                         | **   | **   | 85   | 83.1  | 82   | 81   | 93   | 89.4 |
| Lymphocyte count, ( $\times 10^3/\mu\text{L}$ ) | 1.18-3.74                     | **   | **   | 0.22 | 0.13  | 0.08 | 0.16 | 0.08 | 0.08 |
| Lymphocytes (%)                                 | 20-50                         | **   | **   | 8    | 8.8   | 8    | 10   | 2    | 2    |
| D- Dimer (ng/mL)                                | 0-229                         | **   | **   | **   | **    | 451  | **   | **   | **   |
| CRP (mg/dL)                                     | $\leq 0.9$                    | **   | **   | **   | **    | 19.0 | **   | **   | **   |
| ESR (mm/hr)                                     | 0-20                          | **   | 5    | **   | **    | 25   | **   | **   | **   |
| LDH (U/L)                                       | 118-230                       | **   | 321  | **   | 280   | 375  | 317  | 444  | **   |

Abbreviations. CRP: C-reactive protein; CT: cycle threshold; ESR: Erythrocyte sedimentation rate; LDH: Lactate dehydrogenase; WBC: White blood cells; \*\* Indicates that these laboratory values were not available.

**Supplementary Table 4.** Immune and serum profiles of patient 16902 during the disease course.

| Laboratory Parameter                            | Normal Range | Days after COVID-19 Diagnosis |      |      |      |      |      |      |      |      |  |
|-------------------------------------------------|--------------|-------------------------------|------|------|------|------|------|------|------|------|--|
|                                                 |              | 0                             | 1    | 7    | 11   | 14   | 28   | 36   | 47   | 52   |  |
| CT value                                        |              |                               |      |      |      |      | 25.1 |      | 23   |      |  |
| WBC count, ( $\times 10^3/\mu\text{L}$ )        | 3.4-11.2     | 1.0                           | 1.22 | 5.8  | 2.2  | 2.8  | 3.53 | 4.17 | 1.03 | 1.63 |  |
| Neutrophil count, ( $\times 10^3/\mu\text{L}$ ) | 1.56-6.13    | 0.6                           | 0.83 | 4.2  | 1.5  | 2.1  | 2.93 | 3.59 | 0.83 | 1.55 |  |
| Neutrophils (%)                                 | 45-75        | 61.4                          | 66   | 80   | 66   | 80   | 83   | 86   | 79   | 95   |  |
| Lymphocyte count, ( $\times 10^3/\mu\text{L}$ ) | 1.18-3.74    | 0.2                           | 0.17 | 0.52 | 0.37 | 0.28 | 0.19 | 0.17 | 0.08 | 0.08 |  |
| Lymphocytes (%)                                 | 20-50        | 18.5                          | 14   | 9    | 16   | 10   | 5.4  | 4    | 8    | 6    |  |
| D- Dimer (ng/mL)                                | 0-229        | **                            | **   | **   | **   | **   | 160  | 338  | 175  | 1588 |  |
| CRP (mg/dL)                                     | $\leq 0.9$   | **                            | 9.2  | **   | **   | **   | 7.9  | 0.7  | 0.4  | 0.4  |  |
| LDH (U/L)                                       | 118-230      | 273                           | 274  | 523  | 312  | 325  | 414  | 363  | 502  | 575  |  |
| Procalcitonin (ng/mL)                           | $\leq 0.08$  | **                            | **   | **   | **   | **   | **   | **   | **   | **   |  |

Abbreviations. CRP: C-reactive protein; CT: cycle threshold; ESR: Erythrocyte sedimentation rate; LDH: Lactate dehydrogenase; WBC: White blood cells; \*\* Indicates that these laboratory values were not available.

**Supplementary Table 5.** Immune and serum profiles of patient 17072 during the disease course.

| Laboratory Parameter                  | Normal Range | -2   | 22    | 23    | 24    | 30    | 31    | 34    | 36    | 42    | 46    | 52    | 60    | 66   | 68   | 77    | 80    | 81    |
|---------------------------------------|--------------|------|-------|-------|-------|-------|-------|-------|-------|-------|-------|-------|-------|------|------|-------|-------|-------|
| CT value                              |              |      |       |       |       |       |       | 24.4  |       |       |       | 21.9  | 26.5  |      | 20.2 |       | 25.7  |       |
| WBC count, ( $\times 10^9/L$ )        | 3.4-11.2     | 10.5 | 14.12 | 18.36 | 15.4  | 21.22 | 12.86 | 21.79 | 23.53 | 15.57 | 15.23 | 15.72 | 14.18 | 9.6  | 8.82 | 14.43 | 11.48 | 14.04 |
| Neutrophil count, ( $\times 10^9/L$ ) | 1.8-7.0      | 7.6  | 12.86 | 15.97 | 11.99 | 19.1  | 12.86 | 19.02 | 22.12 | 14.57 | 13.07 | 14.16 | 12.39 | 7.5  | 6.33 | 12.43 | 10.23 | 12.12 |
| Neutrophils (%)                       | 45-75        | 72.4 | 90    | 87    | 79.6  | 88    | 91.5  | 87.3  | 94.0  | 88.0  | 85.8  | 84.5  | 87.4  | 78.2 | 71.7 | 86.2  | 89.1  | 86.3  |
| Lymphocyte count, ( $\times 10^9/L$ ) | 1.18-3.74    | 1.4  | 0.57  | 1.1   | 0.81  | 0.85  | 0.39  | 0.67  | 0.71  | 0.60  | 0.55  | 0.74  | 0.50  | 0.99 | 1.13 | 0.61  | 0.46  | 1.08  |
| Lymphocytes (%)                       | 20-50        | 13.1 | 3     | 6     | 5.4   | 4     | 2.7   | 3.1   | 3.0   | 3.6   | 3.6   | 4.5   | 3.5   | 10.3 | 12.8 | 4.2   | 4.0   | 7.7   |
| D- Dimer (ng/mL)                      | 0-229        |      | <150  |       |       | <150  |       |       |       |       |       | 161   |       | 156  |      |       |       |       |
| CRP (mg/dL)                           | <=0.9        |      |       | 8.7   | 4.9   | 13.7  |       | 14    | 20    | 11.3  | 9.1   |       |       |      |      |       |       |       |
| ESR (mm/hr)                           | 0-20         |      | 59    |       |       | 49    |       |       |       |       |       |       |       |      |      |       |       |       |
| LDH (U/L)                             | 118-230      | 183  |       |       | 289   | 386   |       |       |       |       |       |       |       |      |      |       |       |       |
| Procalcitonin (ng/mL)                 | <=0.08       |      | 0.72  |       |       | 0.75  |       | 0.49  |       | 0.29  |       |       |       |      |      |       | 0.61  |       |

Abbreviations. CRP: C-reactive protein; CT: cycle threshold; ESR: Erythrocyte sedimentation rate; IL-6: Interleukin-6; LDH: Lactate dehydrogenase; WBC: White blood cells; \*\* Indicates that no other laboratory values were available on the first day of SARS-CoV2 infection (Day 0).

**Supplementary Table 6.** Virus isolation from nasopharyngeal swabs of immunocompromised patients.

| Patient ID | Viral load (Ct value) | Days post-diagnosis | Virus isolation | Passages in Vero E6 TMPRSS2 | Consensus mutations (clinical sample vs prototype strain) | Consensus mutations in nsp5/nsp12 (clinical sample vs passage 3) | Clade |
|------------|-----------------------|---------------------|-----------------|-----------------------------|-----------------------------------------------------------|------------------------------------------------------------------|-------|
| 11595      | 20.7                  | 38                  | yes             | 3                           | nsp12 M794I, Spike E484Q, Spike Q677H                     | nsp12 Q444K, nsp12 I794M, nsp12 M900V                            | 20G   |
| 16902      | NA                    | 0                   | yes             | 3                           | No mutations                                              | No mutations                                                     | 21K   |
|            | NA                    | 1                   | no              | -                           | -                                                         | -                                                                | -     |
|            | NA                    | 7                   | no              | -                           | -                                                         | -                                                                | -     |
|            | NA                    | 11                  | no              | -                           | -                                                         | -                                                                | -     |
|            | NA                    | 18                  | no              | -                           | -                                                         | -                                                                | -     |
|            | 19.10                 | 42                  | no              | -                           | -                                                         | -                                                                | -     |
|            | 25.4                  | 50                  | no              | -                           | -                                                         | -                                                                | -     |
| 17072      | 26.5                  | 60                  | no              | -                           | -                                                         | -                                                                | -     |
|            | NA                    | 77                  | yes             | 3                           | nsp5 T169I, nsp12 V223I, nsp12 V792I                      | No mutations                                                     | 21K   |
|            | 25.7                  | 80                  | no              | -                           | -                                                         | -                                                                | -     |
|            | NA                    | 81                  | yes             | 3                           | nsp5 T169I, nsp12 V223I, nsp12 V792I                      | nsp5 M165I, nsp5 I169T, nsp12 I792V                              | 21K   |

Note: NA: Not available; - not available as no virus was isolated.

**Supplementary Table 7.** The IC<sub>50</sub> values (μM) of nirmatrelvir and remdesivir against SARS-CoV-2 isolates WT and nsp5<sup>T169I</sup>nsp12<sup>V792I</sup> in this study.

|                                              | Pre-treatment         |      | Simultaneous treatment |      | Post-treatment        |      |
|----------------------------------------------|-----------------------|------|------------------------|------|-----------------------|------|
|                                              | IC <sub>50</sub> (μM) | Fold | IC <sub>50</sub> (μM)  | Fold | IC <sub>50</sub> (μM) | Fold |
| <b>Nirmatrelvir</b>                          |                       |      |                        |      |                       |      |
| WT                                           | 1.77                  | 1    | 0.95                   | 1    | 1.67                  | 1    |
| nsp5 <sup>T169I</sup> nsp12 <sup>V792I</sup> | 3.93                  | 2.22 | 2.89                   | 3.04 | 3.62                  | 2.17 |
|                                              |                       |      |                        |      |                       |      |
| <b>Remdesivir</b>                            |                       |      |                        |      |                       |      |
| WT                                           | 8.8                   | 1    | 6.68                   | 1    | 7.5                   | 1    |
| nsp5 <sup>T169I</sup> nsp12 <sup>V792I</sup> | 16.7                  | 1.9  | 15.29                  | 2.34 | 14.56                 | 1.94 |



**Supplementary Table 8.** Binding energies (in kcal/mol) of nirmatrelvir drug molecule against nsp5 protein of WT and nsp5<sup>T169I</sup>nsp12<sup>V792I</sup> isolates. Hydrogen and hydrophobic interactions are highlighted, providing insights into the molecular interactions at the binding interface.

|                                                                               | Binding Energy (kcal/mol) | H-bond      |              |           |                               | Hydrophobic Interactions                                                              |
|-------------------------------------------------------------------------------|---------------------------|-------------|--------------|-----------|-------------------------------|---------------------------------------------------------------------------------------|
|                                                                               |                           | Residue No. | No. of Bonds | Molecules | Bond Length (Å <sup>0</sup> ) |                                                                                       |
| nsp5 of WT docked with nirmatrelvir                                           | -7.8                      | His163      | 2            | NE2-F3    | 3.16                          | Met49, Leu141, Asn142, Ser144, Cys145, His164, Met165, Asp187, Arg188, Gln189, Gln192 |
|                                                                               |                           |             |              | NE2-F2    | 3.17                          |                                                                                       |
|                                                                               |                           | Glu166      | 2            | N-O2      | 3.10                          |                                                                                       |
|                                                                               |                           |             |              | O-N2      | 3.25                          |                                                                                       |
| nsp5 of nsp5 <sup>T169I</sup> nsp12 <sup>V792I</sup> docked with nirmatrelvir | -6.9                      | Gly143      | 1            | N-O1      | 3.01                          | His41, Met49, Phe140, Leu141, Asn142, His164, Met165, Gln189                          |
|                                                                               |                           | Cys145      | 1            | SG-O1     | 3.03                          |                                                                                       |
|                                                                               |                           | Glu166      | 1            | N-O3      | 3.25                          |                                                                                       |

**Supplementary Table 9.** Binding energies (in kcal/mol) of remdesivir drug molecules against nsp12 protein of WT and nsp5<sup>T169I</sup>nsp12<sup>V792I</sup> isolates. Hydrogen and hydrophobic interactions are highlighted, providing insights into the molecular interactions at the binding interface.

|                                                                       | Binding Energy (kcal/mol) | H-bond      |              |           |                               | Hydrophobic Interactions                                               |
|-----------------------------------------------------------------------|---------------------------|-------------|--------------|-----------|-------------------------------|------------------------------------------------------------------------|
|                                                                       |                           | Residue No. | No. of Bonds | Molecules | Bond Length (Å <sup>0</sup> ) |                                                                        |
| nsp12 of WT docked with RTP                                           | -7.1                      | Asp618      | 1            | OD1-N5    | 3.13                          | Lys621, Ser681, Ser682, Thr687, Asp761,                                |
|                                                                       |                           | Tyr619      | 1            | O-O2      | 2.89                          |                                                                        |
|                                                                       |                           | Cys622      | 1            | N-O2      | 3.12                          |                                                                        |
|                                                                       |                           | Asp623      | 2            | OD1-O13   | 2.84                          |                                                                        |
|                                                                       |                           |             |              | N-O13     | 3.03                          |                                                                        |
|                                                                       |                           | Thr680      | 1            | OG1-O9    | 2.86                          |                                                                        |
|                                                                       |                           | Asn691      | 1            | ND2-O6    | 2.81                          |                                                                        |
|                                                                       |                           | Ser759      | 1            | OG-O6     | 2.84                          |                                                                        |
| Asp760                                                                | 2                         | OD2-O12     | 3.08         |           |                               |                                                                        |
|                                                                       |                           | OD1-O12     | 3.29         |           |                               |                                                                        |
| nsp12 of nsp5 <sup>T169I</sup> nsp12 <sup>V792I</sup> docked with RTP | -7.1                      | Asn497      | 2            | N-O9      | 3.05                          | Val495, Asn496, Arg569, Gln573, Leu576, Thr686, Thr687, Gly683, Tyr689 |
|                                                                       |                           |             |              | O-O9      | 3.18                          |                                                                        |
|                                                                       |                           | Ser682      | 1            | O-O13     | 2.80                          |                                                                        |
|                                                                       |                           | Asp684      | 1            | O-O13     | 2.70                          |                                                                        |
| Ala685                                                                | 1                         | O-O2        | 3.22         |           |                               |                                                                        |

**Supplementary Table 10.** Primers used for whole-genome sequencing of SARS-CoV-2 on the Oxford Nanopore technologies GridION platform.

| Name              | Sequence                        | Name                 | Sequence                 |
|-------------------|---------------------------------|----------------------|--------------------------|
| 24 pool 1         | TTCTCCTAAGAAGCTATTAATAATCACATGG | 23 R pool 2          | TTCGCTGATTTTGGGGTCCA     |
| 24 R pool 1       | GGCTCTCCATATAGGCAGCT            | 23 F pool 2          | TTTCTCTGGCTGTTATGGC      |
| 24 F pool 1       | TGGGTAGTCTTGTAGTGCCT            | 21 R pool 2 alt_2    | TTGCAGCAGGATCCACAAGA     |
| 22 R pool 1       | GCTGAGCCACATCAAGCCTA            | 21 R pool 2          | AGCCAGCTATAAAACCTAGCCA   |
| 22 F pool 1       | CCTCAATGAGGTTGCCAAGA            | 21 F pool 2 alt_2    | TTTCAAACACGTGCAGGCTG     |
| 20 R pool 1       | CTGCACCAAGTGACATAGTGT           | 19 F pool 2          | ACAGATGCGCAAACAGGTTC     |
| 20 F pool 1       | GGACCTTGAAGGAAAACAGGGT          | 17 R pool 2          | TGTCACTACAAGGCTGTGCA     |
| 18 R pool 1       | TGGCCATCTTTACACCAAAGC           | 17 F pool 2 alt omi  | TGTGTACATTGGCGACCCTG     |
| 18 F pool 1       | TGCGGCTTGTAGAAAGGTTCA           | 15 R pool 2          | GCCTCATAAAACTCAGGTTCCC   |
| 16 R pool 1       | ACAATTTACAGCAGGACAACGC          | 15 F pool 2          | ATGCACGCTGCTTCTGGTAA     |
| 16 R pool 1 alt   | AGGACAACGCCGACAAGTTC            | 13 R pool 2          | GCAGACGGTACAGACTGTGT     |
| 16 F pool 1       | TGCTTACCCACTTACTAAACATCCT       | 13 R pool 2 alt      | CCCACAGGGTCATTAGCACA     |
| 16 F pool 1 alt   | TGAACGGTTCGTGTCTTTAGC           | 13 F pool 2 alt_2    | TCTTGTGCTGCCGGTACTAC     |
| 14 R pool 1       | GCAGCATTACCATCCTGAGC            | 11 R pool 2 alt_2    | TGGCTGCTGTTGTAAGAGGT     |
| 14 F pool 1       | ATCCTTTGGTGGTGCATCGT            | 11,855 F pool 2      | GTTGGGTGTTGGTGGCAAAC     |
| 12 R pool 1 alt_2 | GCAAGTACAAACCTACCTCCCT          | 11 F pool 2 alt      | ATTGTTGGGTGTTGGTGGCA     |
| 12 F pool 1 alt_2 | AATTTGACCGTGATGCAGCC            | 9 R pool 2 alt omi   | YCTCATAGCACATTGGTAAACAC  |
| 10 R pool 1       | CTGGACACATTGAGCCCACA            | 9 F pool 2           | TTTTGTCGTGCCTGGTTTGC     |
| 10 F pool 1       | GACACCTAAGTATAAGTTGTTCGC        | 9 F pool 2 alt       | GCCCATGATTGCTGCAGTC      |
| 8 R pool 1        | GCTGATGTTGCAAAGTCAGTGT          | 7 F pool 2 alt omi   | ACCAACCATATCCAAACGCA     |
| 8 F pool 1        | GCCCCGATTCAGCTATGGT             | 7 R pool 2 alt omi   | TGCAAAAGCCTTTACCTCCA     |
| 6 R pool 1        | TCAATAGCCACCACATCACCA           | 5 R pool 2 alt_2     | GTTCATACTGAGCAGGTGGTG    |
| 6 R pool 1 alt    | CAATAGCCACCACATCACCA            | 5 F pool 2 alt_2     | ACGTGTTGAGGCTTTTGTAGT    |
| 6 F pool 1 alt_2  | GCTGTTATGTACATGGGCACAC          | 3 R pool 2           | ACCGAGCAGCTTCTTCCAAA     |
| 4 R pool 1 alt_2  | TGCTGACATGTACCTACCCAG           | 3 F pool 2           | GTGAAGAAGAAGAGTTTGTAGCCA |
| 4 F pool 1        | GGTGTGGTTGATTATGGTGCT           | 1 R pool 2           | GACCTTCGGAACCTTCTCCA     |
| 4 F pool 1 alt    | GGGTGTGGTTGATTATGGTGCT          | 1 F pool 2 alt_2 omi | ACCAACCAACTTTYGATCTCT    |
| 2 R pool 1        | GCAGAAGTGGCACCAAATTCC           | 19 R pool 2 omi      | TCTACCAATGGTTCTAAAGCCG   |
| 2 F pool 1        | TTCTTCGTAAGGGTGGTTCGC           |                      |                          |
